# Supplementary material for: Risk Prediction for Gastric Cancer Using GWAS-Identifie Polymorphisms, Helicobacter pylori Infection and Lifestyle-Related Risk Factors in a Japanese Population
Source: MDPI journal article supplement (doi:10.3390/cancers13215525), 2021-11-03
Supplement: s1 [file s1]

# Risk Prediction for Gastric Cancer Using GWAS-identified Polymorphisms, *Helicobacter pylori* Infection and Lifestyle-Related Risk Factors in a Japanese Population

Naoyo Ishikura, Hidemi Ito, Isao Oze, Yuriko N. Koyanagi, Yumiko Kasugai, Yukari Taniyama, Yukino Kawakatsu, Tsutomu Tanaka, Seiji Ito, Masahiro Tajika, Yasuhiro Shimizu, Yasumasa Niwa and Keitaro Matsuo

**Table S1.** Associations of epidemiological and clinical risk factors in stomach cancer (validation study and meta-analysis)

| Characteristics                  |             | Validation study         |              |                          |              | Meta-analysis            |              |                          |              |
|----------------------------------|-------------|--------------------------|--------------|--------------------------|--------------|--------------------------|--------------|--------------------------|--------------|
|                                  |             | Model 1                  |              | Model 2                  |              | Model 1                  |              | Model 2                  |              |
|                                  |             | OR <sup>a</sup> (95% CI) |              | OR <sup>b</sup> (95% CI) |              | OR <sup>a</sup> (95% CI) |              | OR <sup>b</sup> (95% CI) |              |
| Smoking <sup>c</sup>             |             |                          |              |                          |              |                          |              |                          |              |
|                                  | Never       | Reference                |              | Reference                |              | Reference                |              | Reference                |              |
|                                  | Former      | 1.12                     | (0.86 -1.47) | 1.36                     | (0.99 -1.87) | 1.14                     | (0.94 -1.38) | 1.20                     | (0.95 -1.52) |
|                                  | Current     | 1.79                     | (1.35 -2.39) | 1.70                     | (1.21 -2.39) | 1.85                     | (1.53 -2.23) | 1.76                     | (1.41 -2.21) |
|                                  | p for trend | 6.44×10 <sup>-5</sup>    |              | 0.24×10 <sup>-2</sup>    |              | 5.37×10 <sup>-11</sup>   |              | 2.49×10 <sup>-7</sup>    |              |
| Alcohol consumption <sup>c</sup> |             |                          |              |                          |              |                          |              |                          |              |
|                                  | Never       | Reference                |              | Reference                |              | Reference                |              | Reference                |              |
|                                  | Low         | 0.94                     | (0.74 -1.18) | 0.84                     | (0.62 -1.13) | 0.86                     | (0.71 -1.03) | 0.89                     | (0.73 -1.08) |
|                                  | Mod         | 1.12                     | (0.84 -1.50) | 1.00                     | (0.69 -1.46) | 1.07                     | (0.87 -1.33) | 1.00                     | (0.78 -1.29) |

|                                         |                       |                        |               |                        |               |                        |               |                        |               |
|-----------------------------------------|-----------------------|------------------------|---------------|------------------------|---------------|------------------------|---------------|------------------------|---------------|
|                                         | Heavy                 | 1.40                   | (1.00 -1.96)  | 1.16                   | (0.77 -1.75)  | 1.31                   | (1.04 -1.67)  | 1.23                   | (0.92 -1.64)  |
|                                         | <i>p</i> for trend    | 3.38×10 <sup>-2</sup>  |               | 4.67×10 <sup>-1</sup>  |               | 1.83×10 <sup>-2</sup>  |               | 0.17                   |               |
| Fruit and vegetable intake <sup>c</sup> |                       |                        |               |                        |               |                        |               |                        |               |
|                                         | Highest tertile       | Reference              |               | Reference              |               | Reference              |               | Reference              |               |
|                                         | Middle tertile        | 1.41                   | (1.08 -1.83)  | 1.11                   | (0.81 -1.53)  | 1.30                   | (1.09 -1.55)  | 1.05                   | (0.85 -1.30)  |
|                                         | Lowest tertile        | 1.21                   | (0.94 -1.56)  | 1.04                   | (0.76 -1.42)  | 1.07                   | (0.84 -1.35)  | 0.94                   | (0.77 -1.15)  |
|                                         | <i>p</i> for trend    | 1.11×10 <sup>-2</sup>  |               | 5.14×10 <sup>-1</sup>  |               | 8.80×10 <sup>-1</sup>  |               | 6.05×10 <sup>-1</sup>  |               |
| <i>H. pylori</i> infection (Hp)         |                       |                        |               |                        |               |                        |               |                        |               |
|                                         | Negative              | Reference              |               | Reference              |               | Reference              |               | Reference              |               |
|                                         | Positive              | 3.47                   | (2.76 -4.35)  | 2.69                   | (2.08 -3.49)  | 3.52                   | (3.00 -4.13)  | 2.61                   | (2.18 -3.14)  |
|                                         | <i>p</i> for trend    | 6.83×10 <sup>-27</sup> |               | 6.93×10 <sup>-14</sup> |               | 2.41×10 <sup>-53</sup> |               | 5.25×10 <sup>-25</sup> |               |
| Gastric atrophy (GA) <sup>c</sup>       |                       |                        |               |                        |               |                        |               |                        |               |
|                                         | Negative              | Reference              |               | Reference              |               | Reference              |               | Reference              |               |
|                                         | Positive              | 3.57                   | (2.80 -4.56)  | 2.50                   | (1.90 -3.28)  | 3.40                   | (2.91 -3.98)  | 2.52                   | (2.11 -3.01)  |
|                                         | <i>p</i> for trend    | 2.13×10 <sup>-24</sup> |               | 6.36×10 <sup>-11</sup> |               | 1.93×10 <sup>-53</sup> |               | 1.67×10 <sup>-24</sup> |               |
| ABCD stratification <sup>c</sup>        |                       |                        |               |                        |               |                        |               |                        |               |
| (Hp & GA)                               | Group A [Hp(-) GA(-)] | Reference              |               | Reference              |               | Reference              |               | Reference              |               |
|                                         | Group B [Hp(+) GA(-)] | 4.50                   | (3.33 -6.08)  | 4.36                   | (3.17 -5.98)  | 4.48                   | (3.60 -5.57)  | 4.38                   | (3.48 -5.52)  |
|                                         | Group C [Hp(+) GA(+)] | 6.36                   | (4.62 -8.74)  | 6.27                   | (4.49 -8.76)  | 7.00                   | (5.61 -8.74)  | 7.13                   | (5.55 -9.15)  |
|                                         | Group D [Hp(-) GA(+)] | 17.96                  | (9.21 -35.01) | 15.62                  | (7.74 -31.53) | 11.73                  | (5.52 -24.95) | 11.10                  | (6.43 -19.18) |
|                                         | <i>p</i> for trend    | 2.85×10 <sup>-37</sup> |               | 1.12×10 <sup>-32</sup> |               | 6.44×10 <sup>-39</sup> |               | 7.43×10 <sup>-67</sup> |               |

OR, odds ratio; CI, confidence interval. <sup>a</sup> Crude OR by the conditional logistic regression model. For Fruit and vegetable intake, ORs were adjusted by energy intake. <sup>b</sup> For smoking and fruit and vegetable intake, odds ratios were calculated by a conditional logistic regression model adjusted for age at first visit and family history of gastric cancer, smoking status, drinking habit (alcohol drinking (ethanol (g/day))), energy-adjusted fruit and vegetable intake, energy intake, *H. pylori* infection, gastritis atrophy, and referral pattern. For *H. pylori* infection, gastric

atrophy, and ABCD classification, odds ratios were calculated by a conditional logistic regression model adjusted for age at first visit and family history of gastric cancer, smoking status, drinking habit, energy-adjusted fruit and vegetable intake, energy intake, and referral pattern. <sup>c</sup>Subjects with unknown status are excluded from each analysis.

**Table S2.** Associations with Asian GWAS- identified susceptibility polymorphism in stomach cancer risk (validation study and meta-analysis)

| Reference           | Chromosome | Position  | Genes<br>in/near<br>region | SNP        | Genotypes<br>Risk/non-<br>risk alleles | Validation study<br>(case/control=795/795) |                                     |              | Meta-analysis<br>(Derivation and Validation studies) |              |                               |
|---------------------|------------|-----------|----------------------------|------------|----------------------------------------|--------------------------------------------|-------------------------------------|--------------|------------------------------------------------------|--------------|-------------------------------|
|                     |            |           |                            |            |                                        | Risk allele<br>frequency<br>in controls    | OR <sup>a</sup> (95%CI), per allele |              | OR <sup>a</sup> (95%CI), per allele                  | <i>p</i>     | <i>p</i> for<br>heterogeneity |
|                     |            |           |                            |            |                                        |                                            |                                     |              |                                                      |              |                               |
|                     |            |           |                            |            |                                        |                                            | <i>p</i>                            |              | <i>p</i>                                             |              |                               |
| Abnet CC, et al [1] | 1q22       | 155192276 | MUC1                       | rs4072037  | G/A                                    | 0.816                                      | 1.12                                | (0.93 -1.35) | 1.23                                                 | (1.03 -1.48) | 0.157                         |
|                     |            |           |                            |            |                                        |                                            | 2.27×10 <sup>-1</sup>               |              | 2.51×10 <sup>-2</sup>                                |              |                               |
| Abnet CC, et al [1] | 10q23      | 94306584  | PLCE1                      | rs2274223  | G/A                                    | 0.727                                      | 1.11                                | (0.95 -1.30) | 1.10                                                 | (0.99 -1.23) | 0.83                          |
|                     |            |           |                            |            |                                        |                                            | 1.79×10 <sup>-1</sup>               |              | 8.26×10 <sup>-2</sup>                                |              |                               |
| Hu N, et al. [2]    | 5p13.1     | 40790449  | PRKAA1                     | rs10074991 | G/A                                    | 0.436                                      | 1.24                                | (1.07 -1.43) | 1.21                                                 | (1.10 -1.33) | 0.638                         |
|                     |            |           |                            |            |                                        |                                            | 3.70×10 <sup>-3</sup>               |              | 1.55×10 <sup>-4</sup>                                |              |                               |
| Hu N, et al. [2]    | 6p21.1     | 41037763  | UNC5CL                     | rs2294693  | C/T                                    | 0.252                                      | 1.21                                | (1.03 -1.42) | 1.18                                                 | (1.06 -1.32) | 0.721                         |
|                     |            |           |                            |            |                                        |                                            | 2.32×10 <sup>-2</sup>               |              | 3.00×10 <sup>-3</sup>                                |              |                               |
| Jin G et al. [3]    | 6p21.1     | 40568389  | LRFN2                      | rs2494938  | G/A                                    | 0.677                                      | 0.92                                | (0.79 -1.06) | 0.95                                                 | (0.86 -1.05) | 0.502                         |
|                     |            |           |                            |            |                                        |                                            | 2.48×10 <sup>-1</sup>               |              | 3.31×10 <sup>-1</sup>                                |              |                               |
| Jin G et al. [3]    | 7p15.3     | 21544470  | DNAH11                     | rs2285947  | G/A                                    | 0.340                                      | 1.01                                | (0.87 -1.18) | 1.05                                                 | (0.95 -1.17) | 0.489                         |
|                     |            |           |                            |            |                                        |                                            | 8.74×10 <sup>-1</sup>               |              | 3.17×10 <sup>-1</sup>                                |              |                               |

|                       |             |           |         |            |     |       |                       |              |                       |              |       |
|-----------------------|-------------|-----------|---------|------------|-----|-------|-----------------------|--------------|-----------------------|--------------|-------|
| Sakamoto H, et al.    |             |           |         |            |     |       |                       |              |                       |              |       |
| [4]                   | 8q24.3      | 142680513 | PSCA    | rs2294008  | T/C | 0.608 | 1.21                  | (1.04 -1.41) | 1.31                  | (1.13 -1.53) | 0.141 |
|                       |             |           |         |            |     |       | 1.16×10 <sup>-2</sup> |              | 4.00×10 <sup>-4</sup> |              |       |
| Shi Y, et al. [5]     | 3q13.31     | 114643917 | ZBTB20  | rs9841504  | C/G | 0.800 | 1.06                  | (0.89 -1.27) | 1.05                  | (0.93 -1.18) | 0.843 |
|                       |             |           |         |            |     |       | 4.96×10 <sup>-1</sup> |              | 4.35×10 <sup>-1</sup> |              |       |
| Shi Y, et al. [5]     | 5p13.1      | 40791782  | PRKAA1  | rs13361707 | T/C | 0.438 | 1.23                  | (1.07 -1.42) | 1.20                  | (1.09 -1.33) | 0.658 |
|                       |             |           |         |            |     |       | 4.47×10 <sup>-3</sup> |              | 1.97×10 <sup>-4</sup> |              |       |
| Wang Z, et al. [6]    | 1q22        | 155515236 | ASH1L   | rs80142782 | T/C | 0.963 | 1.43                  | (0.95 -2.13) | 1.51                  | (1.14 -2.02) | 0.673 |
|                       |             |           |         |            |     |       | 8.39×10 <sup>-2</sup> |              | 4.67×10 <sup>-3</sup> |              |       |
| Wang Z, et al. [6]    | 5q14.3      | 89607147  | NA      | rs7712641  | T/C | 0.384 | 1.07                  | (0.93 -1.23) | 1.07                  | (0.97 -1.17) | 0.907 |
|                       |             |           |         |            |     |       | 3.27×10 <sup>-1</sup> |              | 1.96×10 <sup>-1</sup> |              |       |
| Tanikawa C, et al [7] | 9q34.2      | 133251249 | ABO     | rs7849280  | G/A | 0.262 | 1.01                  | (0.87 -1.19) | 1.19                  | (0.87 -1.62) | 0.004 |
|                       |             |           |         |            |     |       | 8.60×10 <sup>-1</sup> |              | 2.72×10 <sup>-1</sup> |              |       |
| Tanikawa C, et al [7] | 12q24.11-12 | 111335541 | CUX2    | rs6490061  | C/T | 0.682 | 1.08                  | (0.93 -1.25) | 1.06                  | (0.96 -1.18) | 0.808 |
|                       |             |           |         |            |     |       | 3.29×10 <sup>-1</sup> |              | 2.45×10 <sup>-1</sup> |              |       |
| Tanikawa C, et al [7] | 20q11.21    | 31411284  | DEFB121 | rs2376549  | C/T | 0.283 | 1.14                  | (0.97 -1.33) | 1.13                  | (1.01 -1.25) | 0.844 |
|                       |             |           |         |            |     |       | 1.02×10 <sup>-1</sup> |              | 2.91×10 <sup>-2</sup> |              |       |

---

OR, odds ratio; CI, confidence interval. \* ORs were adjusted for age and sex.

## Reference

1. Abnet, C.C.; Freedman, N.D.; Hu, N.; Wang, Z.; Yu, K.; Shu, X.O.; Yuan, J.M.; Zheng, W.; Dawsey, S.M.; Dong, L.M.; et al. A shared susceptibility locus in PLCE1 at 10q23 for gastric adenocarcinoma and esophageal squamous cell carcinoma. *Nat. Genet.* **2010**, *42*, 764–768, doi:10.1038/ng.649
2. Hu, N.; Wang, Z.; Song, X.; Wei, L.; Kim, B.S.; Freedman, N.D.; Baek, J.; Burdette, L.; Chang, J.; Chung, C.; et al. Genome-wide association study of gastric adenocarcinoma in Asia: A comparison of associations between cardia and non-cardia tumours. *Gut* **2016**, *65*, 1611–1618, doi:10.1136/gutjnl-2015-309340.
3. Jin, G.; Ma, H.; Wu, C.; Dai, J.; Zhang, R.; Shi, Y.; Lu, J.; Miao, X.; Wang, M.; Zhou, Y.; et al. Genetic variants at 6p21.1 and 7p15.3 are associated with risk of multiple cancers in han chinese. *Am. J. Hum. Genet.* **2012**, *91*, 928–934, doi:10.1016/j.ajhg.2012.09.009.
4. Sakamoto, H.; Yoshimura, K.; Saeki, N.; Katai, H.; Shimoda, T.; Matsuno, Y.; Saito, D.; Sugimura, H.; Tanioka, F.; Kato, S.; et al. Genetic variation in PSCA is associated with susceptibility to diffuse-type gastric cancer. *Nat. Genet.* **2008**, *40*, 730–740, doi:10.1038/ng.152.
5. Shi, Y.; Hu, Z.; Wu, C.; Dai, J.; Li, H.; Dong, J.; Wang, M.; Miao, X.; Zhou, Y.; Lu, F.; et al. A genome-wide association study identifies new susceptibility loci for non-cardia gastric cancer at 3q13.31 and 5p13.1. *Nat. Genet.* **2011**, *43*, 1215–1218, doi:10.1038/ng.978.
6. Wang, Z.; Dai, J.; Hu, N.; Miao, X.; Abnet, C.C.; Yang, M.; Freedman, N.D.; Chen, J.; Burdette, L.; Zhu, X.; et al. Identification of new susceptibility loci for gastric non-cardia adenocarcinoma: Pooled results from two Chinese genome-wide association studies. *Gut* **2017**, *66*, 581–587, doi:10.1136/gutjnl-2015-310612.
7. Tanikawa, C.; Kamatani, Y.; Toyoshima, O.; Sakamoto, H.; Ito, H.; Takahashi, A.; Momozawa, Y.; Hirata, M.; Fuse, N.; Takai-Igarashi, T.; et al. Genome-wide association study identifies gastric cancer susceptibility loci at 12q24.11-12 and 20q11.21. *Cancer Sci.* **2018**, *109*, 4015–4024, doi:10.1111/cas.13815.
